# Supplementary material for: Defining predictors of responsiveness to advanced therapies in Crohn’s disease and ulcerative colitis: protocol for the IBD-RESPONSE and nested CD-metaRESPONSE prospective, multicentre, observational cohort study in precision medicine
Source: PubMed Central journal article supplement (PMC11029295; doi:10.1136/bmjopen-2023-073639), 2024-04-17

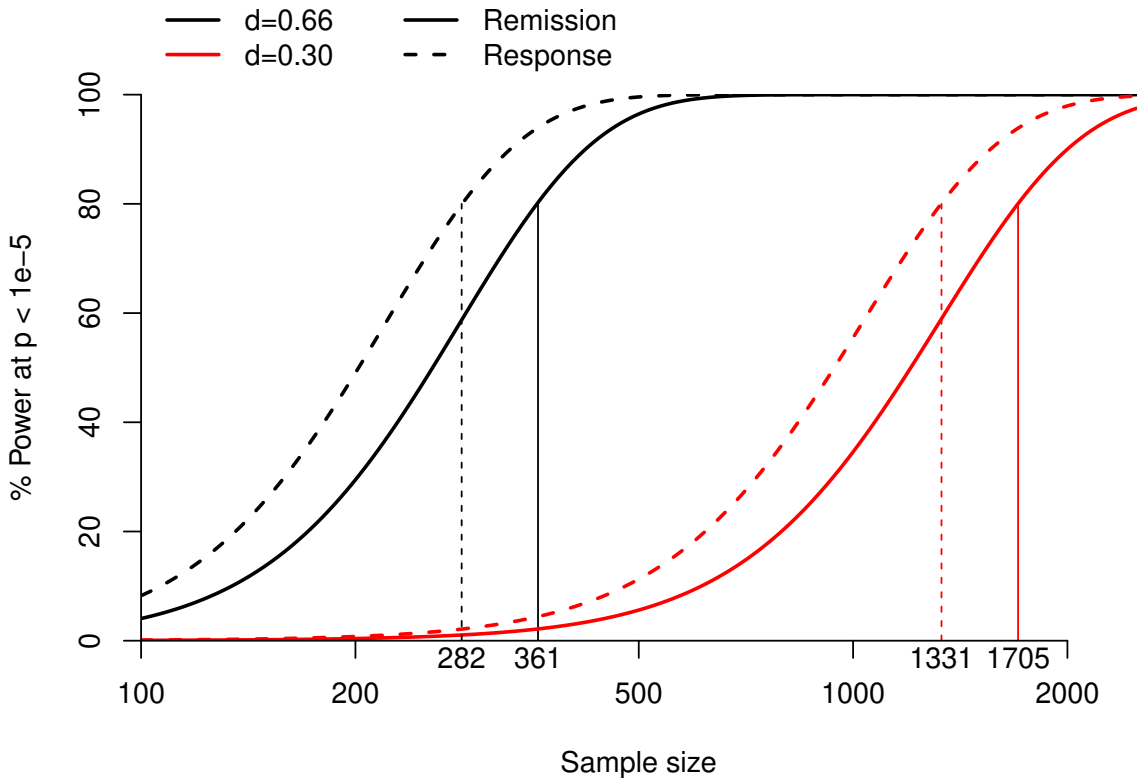

Supplement: bmjopen-2023-073639supp001.pdf [file bmjopen-2023-073639supp001.pdf]
